# Supplementary material
Source: Springer Nature journal article supplement (https://www.springermedizin.de/resource/supplementary/12937_2013_665_MOESM1_ESM.pdf/25653892)

**A**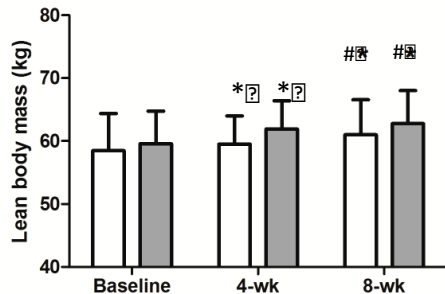**B**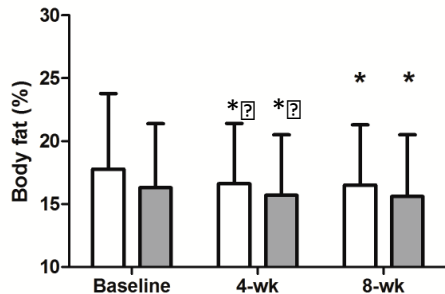**C**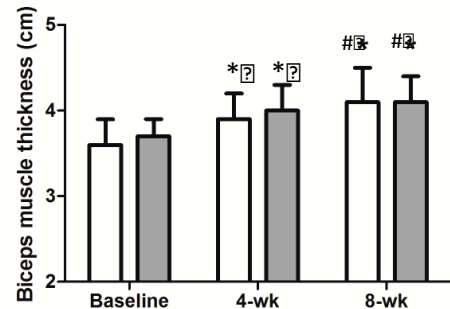**D**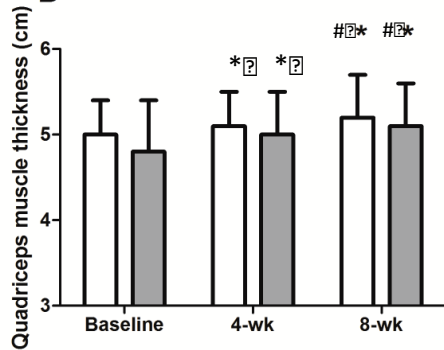

Rice

Whey

Supplement: MOESM1 [file 25653892]
